# Supplementary material for: Inhibition of glucose metabolism prevents glycosylation of the glutamine transporter ASCT2 and promotes compensatory LAT1 upregulation in leukemia cells
Source: PubMed Central journal article supplement (PMC5216804; doi:10.18632/oncotarget.10131), 2016-06-17
Supplement: oncotarget-07-46371-s001.pdf [file oncotarget-07-46371-s001.pdf]

## Inhibition of glucose metabolism prevents glycosylation of the glutamine transporter ASCT2 and promotes compensatory LAT1 upregulation in leukemia cells

### SUPPLEMENTARY FIGURES

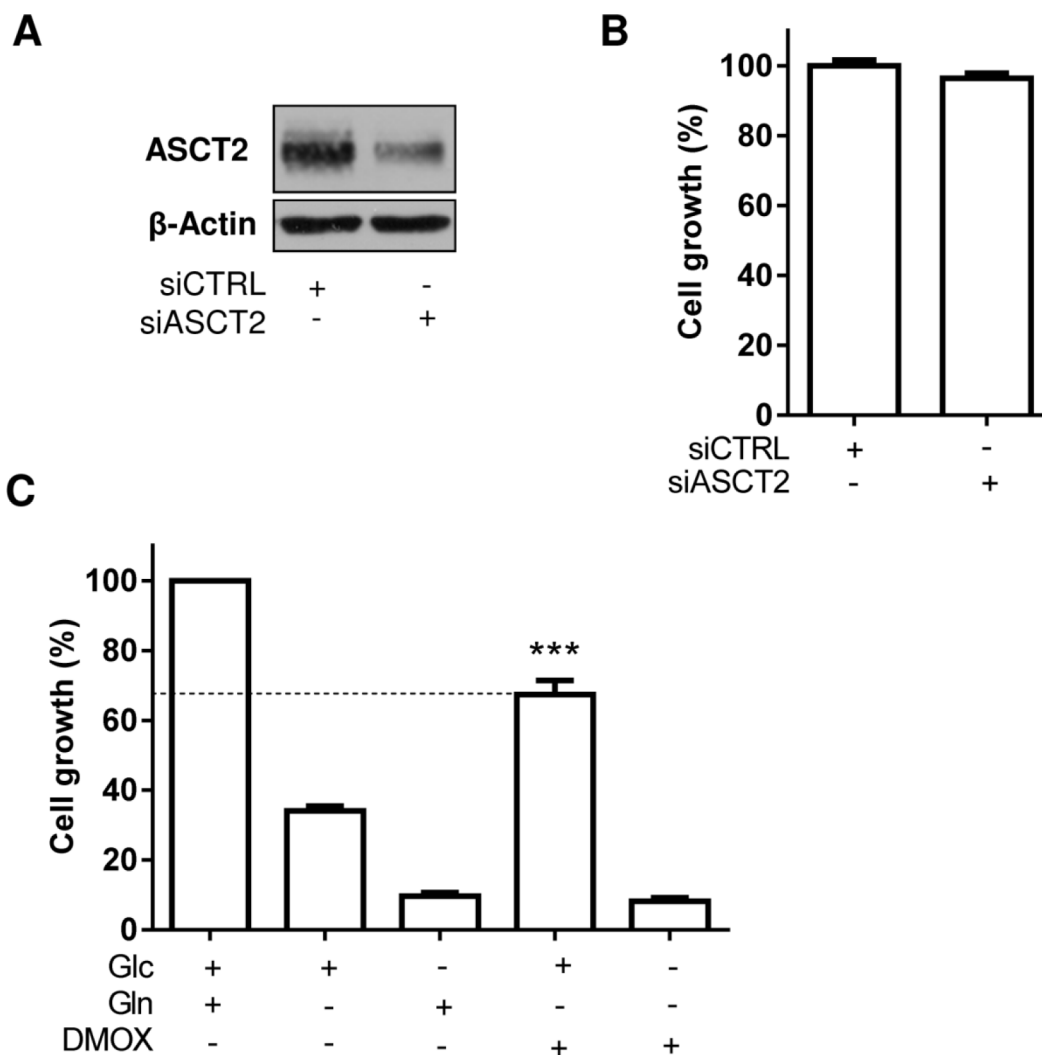

**Supplementary Figure S1: ASCT2 silencing does not alter K-562 cell growth and DMOX does not completely compensate for glutamine deprivation.** **A.** Representative immunoblot depicting ASCT2 silencing upon K-562 cell exposure to dedicated siRNA. Immunoblot was repeated two times with similar results;  $\beta$ -actin immunoblotting was used as loading control. **B.** Inhibition of K-562 cell growth after 48 hours post-treatment with ASCT2 siRNA (\*\* $P < 0.01$ ,  $n = 3$ ). **C.** Cell-permeable dimethylxoglutarate (DMOX) unmasks the contribution of non-metabolized glutamine to K-562 cell growth.

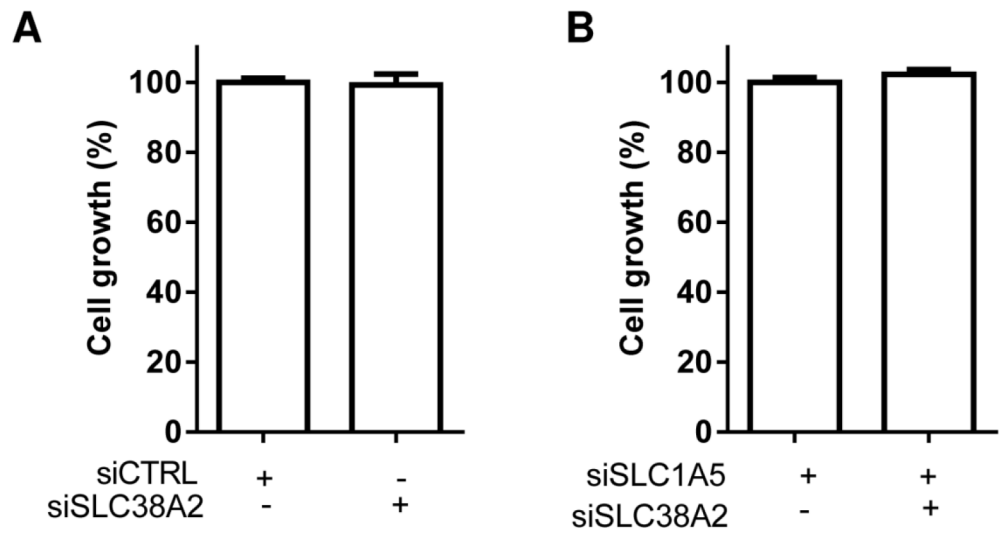

**Supplementary Figure S2: SLC38A2 silencing does not inhibit HL-60 cell growth.** Bar graphs show the effects of 48h incubation with SLC38A2 siRNA **A**, alone or **B**, in combination with SLC1A5/ASCT2 siRNA on HL-60 cell growth. These experiments were repeated once with similar results.

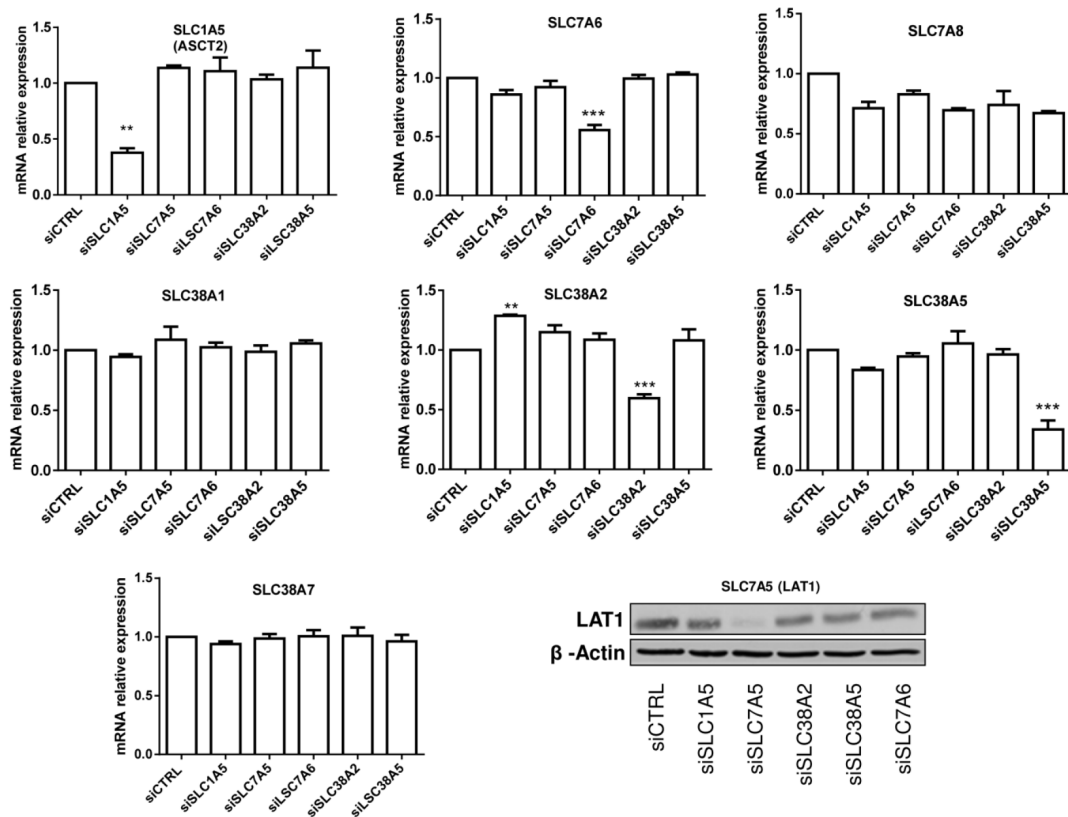

**Supplementary Figure S3: Silencing various Gln transporters expressed in HL-60 cells does not influence their mutual expression.** Shown are the effects of 48h HL-60 cell incubation with the indicated siRNA on the mRNA (bar graphs) or protein expression (immunoblot) of the indicated glutamine transporters (\*\*P<0.01, \*\*\*P<0.001, n=3).
